# Supplementary material for: Genome-wide identification of germin-like proteins in peanut (Arachis hypogea L.) and expression analysis under different abiotic stresses
Source: Frontiers journal article supplement (doi:10.3389/fpls.2022.1044144), 2023-01-23
Supplement: Data_Sheet_1.zip [file Data_Sheet_1.zip]

## Sheet: All Clusters
Supplementary File 2: All clusters found among A. hypogaea, A. duranensis, A. ipaensis, and A. thaliana
Araip|AiGLP20	Araip|AiGLP22	Araip|AiGLP15	Araip|AiGLP21	Ath|AtGLP18	Ath|AtGLP21	Ath|AtGLP22	Ath|AtGLP23	Ath|AtGLP25	Ath|AtGLP27	Ath|AtGLP28	Ath|AtGLP29	Ath|AtGLP30	Ath|AtGLP31	Ath|AtGLP32	Ath|AtGLP33	Ath|AtGLP15	Ath|AtGLP13	Ath|AtGLP10	Ath|AtGLP11	Ath|AtGLP12	Ath|AtGLP9	Aradu|AdGLP27	Aradu|AdGLP22	Aradu|AdGLP18	Aradu|AdGLP15	Arahy|AhGLP63	Arahy|AhGLP29
Ath|AtGLP17	Ath|AtGLP1	Araip|AiGLP29	Aradu|AdGLP36	Arahy|AhGLP80	Araip|AiGLP6	Aradu|AdGLP2	Arahy|AhGLP55	Arahy|AhGLP42	Arahy|AhGLP2
Aradu|AdGLP34	Aradu|AdGLP3	Araip|AiGLP28	Arahy|AhGLP71	Arahy|AhGLP3
Araip|AiGLP12	Arahy|AhGLP67	Araip|AiGLP17	Aradu|AdGLP19	Arahy|AhGLP70
Arahy|AhGLP84	Arahy|AhGLP45	Araip|AiGLP32	Aradu|AdGLP37
Arahy|AhGLP79	Arahy|AhGLP39	Arahy|AhGLP41	Arahy|AhGLP77
Arahy|AhGLP11	Arahy|AhGLP51	Araip|AiGLP7	Aradu|AdGLP9
Araip|AiGLP1	Aradu|AdGLP1	Arahy|AhGLP46	Arahy|AhGLP6
Araip|AiGLP25	Aradu|AdGLP33	Arahy|AhGLP74	Arahy|AhGLP33
Araip|AiGLP2	Aradu|AdGLP6	Arahy|AhGLP47	Arahy|AhGLP7
Araip|AiGLP16	Aradu|AdGLP29	Arahy|AhGLP69	Arahy|AhGLP68
Araip|AiGLP19	Aradu|AdGLP20	Arahy|AhGLP66	Arahy|AhGLP24
Araip|AiGLP14	Aradu|AdGLP26	Arahy|AhGLP60	Arahy|AhGLP17
Araip|AiGLP10	Aradu|AdGLP14	Arahy|AhGLP57	Arahy|AhGLP16
Araip|AiGLP30	Aradu|AdGLP35	Arahy|AhGLP82	Arahy|AhGLP43
Araip|AiGLP4	Aradu|AdGLP11	Arahy|AhGLP14	Arahy|AhGLP54
Araip|AiGLP11	Aradu|AdGLP21	Arahy|AhGLP59	Arahy|AhGLP31
Araip|AiGLP9	Aradu|AdGLP12	Arahy|AhGLP56	Arahy|AhGLP15
Araip|AiGLP18	Aradu|AdGLP28	Arahy|AhGLP65	Arahy|AhGLP25
Araip|AiGLP27	Aradu|AdGLP32	Arahy|AhGLP1	Arahy|AhGLP34
Ath|AtGLP8	Ath|AtGLP4	Ath|AtGLP5
Arahy|AhGLP72	Arahy|AhGLP36	Arahy|AhGLP4
Arahy|AhGLP37	Arahy|AhGLP75	Ath|AtGLP34
Arahy|AhGLP52	Arahy|AhGLP12	Ath|AtGLP19
Araip|AiGLP26	Aradu|AdGLP31	Arahy|AhGLP73
Ath|AtGLP14	Ath|AtGLP20
Aradu|AdGLP7	Aradu|AdGLP13
Arahy|AhGLP21	Arahy|AhGLP20
Arahy|AhGLP44	Arahy|AhGLP81
Arahy|AhGLP62	Arahy|AhGLP26
Arahy|AhGLP78	Arahy|AhGLP40
Arahy|AhGLP38	Arahy|AhGLP76
Araip|AiGLP24	Arahy|AhGLP64
Araip|AiGLP31	Arahy|AhGLP83
Araip|AiGLP3	Arahy|AhGLP49
Ath|AtGLP3	Arahy|AhGLP58
Ath|AtGLP16	Arahy|AhGLP50
Aradu|AdGLP16	Arahy|AhGLP27
Aradu|AdGLP25	Arahy|AhGLP18
Aradu|AdGLP30	Arahy|AhGLP30
Aradu|AdGLP17	Arahy|AhGLP19
Aradu|AdGLP8	Arahy|AhGLP9

## Sheet: Inparalogous
Inparalogous gene pairs in A. thaliana, A. hypogaea, A. duranensis, and A. ipaensis
A. thaliana				A. hypogaea				A. duranensis				A. ipaensis
Ath|AtGLP18	Ath|AtGLP21	0.9197		Arahy|AhGLP84	Arahy|AhGLP45	1.05437		Aradu|AdGLP7	Aradu|AdGLP13	0.93598		Araip|AiGLP20	Araip|AiGLP22	0.99002
Ath|AtGLP18	Ath|AtGLP22	0.9667		Arahy|AhGLP79	Arahy|AhGLP39	0.571		Aradu|AdGLP27	Aradu|AdGLP22	1.16749		Araip|AiGLP22	Araip|AiGLP20	0.99002
Ath|AtGLP18	Ath|AtGLP23	0.9862		Arahy|AhGLP79	Arahy|AhGLP41	1.01114		Aradu|AdGLP18	Aradu|AdGLP15	1.02593		Araip|AiGLP15	Araip|AiGLP21	1.00998
Ath|AtGLP18	Ath|AtGLP25	0.9339		Arahy|AhGLP79	Arahy|AhGLP77	0.575		Aradu|AdGLP34	Aradu|AdGLP3	0.8706		Araip|AiGLP21	Araip|AiGLP15	1.00998
Ath|AtGLP18	Ath|AtGLP27	0.9436		Arahy|AhGLP77	Arahy|AhGLP39	0.94724		Aradu|AdGLP15	Aradu|AdGLP18	1.02593
Ath|AtGLP18	Ath|AtGLP28	0.9261		Arahy|AhGLP77	Arahy|AhGLP41	0.5631		Aradu|AdGLP13	Aradu|AdGLP7	0.93598
Ath|AtGLP18	Ath|AtGLP29	0.9333		Arahy|AhGLP77	Arahy|AhGLP79	0.575		Aradu|AdGLP3	Aradu|AdGLP34	0.8706
Ath|AtGLP18	Ath|AtGLP30	0.9347		Arahy|AhGLP21	Arahy|AhGLP20	2.13628		Aradu|AdGLP22	Aradu|AdGLP27	1.16749
Ath|AtGLP18	Ath|AtGLP31	0.9308		Arahy|AhGLP72	Arahy|AhGLP36	0.96395
Ath|AtGLP18	Ath|AtGLP32	0.9268		Arahy|AhGLP72	Arahy|AhGLP4	0.94969
Ath|AtGLP18	Ath|AtGLP33	0.9282		Arahy|AhGLP36	Arahy|AhGLP4	0.9359
Ath|AtGLP27	Ath|AtGLP15	1.019		Arahy|AhGLP36	Arahy|AhGLP72	0.96395
Ath|AtGLP27	Ath|AtGLP18	0.9436		Arahy|AhGLP37	Arahy|AhGLP75	0.93049
Ath|AtGLP27	Ath|AtGLP21	0.8903		Arahy|AhGLP39	Arahy|AhGLP41	0.5593
Ath|AtGLP27	Ath|AtGLP22	0.8618		Arahy|AhGLP39	Arahy|AhGLP77	0.94724
Ath|AtGLP27	Ath|AtGLP23	0.8805		Arahy|AhGLP39	Arahy|AhGLP79	0.571
Ath|AtGLP27	Ath|AtGLP25	0.8811		Arahy|AhGLP44	Arahy|AhGLP81	0.97425
Ath|AtGLP27	Ath|AtGLP28	1.29151		Arahy|AhGLP62	Arahy|AhGLP26	0.7987
Ath|AtGLP27	Ath|AtGLP29	1.13427		Arahy|AhGLP78	Arahy|AhGLP40	0.95614
Ath|AtGLP27	Ath|AtGLP30	1.29796		Arahy|AhGLP4	Arahy|AhGLP36	0.9359
Ath|AtGLP27	Ath|AtGLP31	1.13689		Arahy|AhGLP4	Arahy|AhGLP72	0.94969
Ath|AtGLP27	Ath|AtGLP32	1.29029		Arahy|AhGLP41	Arahy|AhGLP39	0.5593
Ath|AtGLP27	Ath|AtGLP33	1.13432		Arahy|AhGLP41	Arahy|AhGLP77	0.5631
Ath|AtGLP13	Ath|AtGLP10	0.8224		Arahy|AhGLP41	Arahy|AhGLP79	1.01114
Ath|AtGLP13	Ath|AtGLP11	0.8257		Arahy|AhGLP52	Arahy|AhGLP12	0.98065
Ath|AtGLP13	Ath|AtGLP12	0.8269		Arahy|AhGLP81	Arahy|AhGLP44	0.97425
Ath|AtGLP13	Ath|AtGLP15	1.0236		Arahy|AhGLP11	Arahy|AhGLP51	2.07772
Ath|AtGLP13	Ath|AtGLP29	0.8624		Arahy|AhGLP26	Arahy|AhGLP62	0.7987
Ath|AtGLP13	Ath|AtGLP31	0.865		Arahy|AhGLP12	Arahy|AhGLP52	0.98065
Ath|AtGLP13	Ath|AtGLP33	0.8675		Arahy|AhGLP51	Arahy|AhGLP11	2.07772
Ath|AtGLP13	Ath|AtGLP9	0.8644		Arahy|AhGLP38	Arahy|AhGLP76	1.01504
Ath|AtGLP8	Ath|AtGLP4	0.7149		Arahy|AhGLP40	Arahy|AhGLP78	0.95614
Ath|AtGLP8	Ath|AtGLP5	0.7529		Arahy|AhGLP76	Arahy|AhGLP38	1.01504
Ath|AtGLP22	Ath|AtGLP18	0.9667		Arahy|AhGLP45	Arahy|AhGLP84	1.05437
Ath|AtGLP22	Ath|AtGLP21	1.0582		Arahy|AhGLP20	Arahy|AhGLP21	2.13628
Ath|AtGLP22	Ath|AtGLP23	1.30376		Arahy|AhGLP75	Arahy|AhGLP37	0.93049
Ath|AtGLP22	Ath|AtGLP25	0.9713
Ath|AtGLP22	Ath|AtGLP27	0.8618
Ath|AtGLP22	Ath|AtGLP30	0.8444
Ath|AtGLP17	Ath|AtGLP1	0.9763
Ath|AtGLP32	Ath|AtGLP15	1.0183
Ath|AtGLP32	Ath|AtGLP18	0.9268
Ath|AtGLP32	Ath|AtGLP21	0.8797
Ath|AtGLP32	Ath|AtGLP23	0.8482
Ath|AtGLP32	Ath|AtGLP25	0.8483
Ath|AtGLP32	Ath|AtGLP27	1.29029
Ath|AtGLP32	Ath|AtGLP28	1.37081
Ath|AtGLP32	Ath|AtGLP29	1.0963
Ath|AtGLP32	Ath|AtGLP30	1.38753
Ath|AtGLP32	Ath|AtGLP31	1.0989
Ath|AtGLP32	Ath|AtGLP33	1.0963
Ath|AtGLP1	Ath|AtGLP17	0.9763
Ath|AtGLP29	Ath|AtGLP13	0.8624
Ath|AtGLP29	Ath|AtGLP15	1.0396
Ath|AtGLP29	Ath|AtGLP18	0.9333
Ath|AtGLP29	Ath|AtGLP21	0.8469
Ath|AtGLP29	Ath|AtGLP27	1.13427
Ath|AtGLP29	Ath|AtGLP28	1.1021
Ath|AtGLP29	Ath|AtGLP30	1.104
Ath|AtGLP29	Ath|AtGLP31	1.4043
Ath|AtGLP29	Ath|AtGLP32	1.0963
Ath|AtGLP29	Ath|AtGLP33	1.40819
Ath|AtGLP28	Ath|AtGLP15	1.0196
Ath|AtGLP28	Ath|AtGLP18	0.9261
Ath|AtGLP28	Ath|AtGLP21	0.8811
Ath|AtGLP28	Ath|AtGLP23	0.8514
Ath|AtGLP28	Ath|AtGLP25	0.8515
Ath|AtGLP28	Ath|AtGLP27	1.29151
Ath|AtGLP28	Ath|AtGLP29	1.1021
Ath|AtGLP28	Ath|AtGLP30	1.37859
Ath|AtGLP28	Ath|AtGLP31	1.1047
Ath|AtGLP28	Ath|AtGLP32	1.37081
Ath|AtGLP28	Ath|AtGLP33	1.1021
Ath|AtGLP30	Ath|AtGLP15	1.0196
Ath|AtGLP30	Ath|AtGLP18	0.9347
Ath|AtGLP30	Ath|AtGLP21	0.8876
Ath|AtGLP30	Ath|AtGLP22	0.8444
Ath|AtGLP30	Ath|AtGLP23	0.8559
Ath|AtGLP30	Ath|AtGLP25	0.856
Ath|AtGLP30	Ath|AtGLP27	1.29796
Ath|AtGLP30	Ath|AtGLP28	1.37859
Ath|AtGLP30	Ath|AtGLP29	1.104
Ath|AtGLP30	Ath|AtGLP31	1.1066
Ath|AtGLP30	Ath|AtGLP32	1.38753
Ath|AtGLP30	Ath|AtGLP33	1.104
Ath|AtGLP11	Ath|AtGLP10	0.9913
Ath|AtGLP11	Ath|AtGLP12	1.28253
Ath|AtGLP11	Ath|AtGLP13	0.8257
Ath|AtGLP11	Ath|AtGLP15	0.9405
Ath|AtGLP11	Ath|AtGLP9	1.0061
Ath|AtGLP23	Ath|AtGLP18	0.9862
Ath|AtGLP23	Ath|AtGLP21	1.0641
Ath|AtGLP23	Ath|AtGLP22	1.30376
Ath|AtGLP23	Ath|AtGLP25	1.0067
Ath|AtGLP23	Ath|AtGLP27	0.8805
Ath|AtGLP23	Ath|AtGLP28	0.8514
Ath|AtGLP23	Ath|AtGLP30	0.8559
Ath|AtGLP23	Ath|AtGLP31	0.8327
Ath|AtGLP23	Ath|AtGLP32	0.8482
Ath|AtGLP23	Ath|AtGLP33	0.8341
Ath|AtGLP33	Ath|AtGLP13	0.8675
Ath|AtGLP33	Ath|AtGLP15	1.0434
Ath|AtGLP33	Ath|AtGLP18	0.9282
Ath|AtGLP33	Ath|AtGLP21	0.8586
Ath|AtGLP33	Ath|AtGLP23	0.8341
Ath|AtGLP33	Ath|AtGLP25	0.8392
Ath|AtGLP33	Ath|AtGLP27	1.13432
Ath|AtGLP33	Ath|AtGLP28	1.1021
Ath|AtGLP33	Ath|AtGLP29	1.40819
Ath|AtGLP33	Ath|AtGLP30	1.104
Ath|AtGLP33	Ath|AtGLP31	1.41966
Ath|AtGLP33	Ath|AtGLP32	1.0963
Ath|AtGLP12	Ath|AtGLP10	1.0081
Ath|AtGLP12	Ath|AtGLP11	1.28253
Ath|AtGLP12	Ath|AtGLP13	0.8269
Ath|AtGLP12	Ath|AtGLP15	0.932
Ath|AtGLP12	Ath|AtGLP9	1.0287
Ath|AtGLP21	Ath|AtGLP18	0.9197
Ath|AtGLP21	Ath|AtGLP22	1.0582
Ath|AtGLP21	Ath|AtGLP23	1.0641
Ath|AtGLP21	Ath|AtGLP25	0.9732
Ath|AtGLP21	Ath|AtGLP27	0.8903
Ath|AtGLP21	Ath|AtGLP28	0.8811
Ath|AtGLP21	Ath|AtGLP29	0.8469
Ath|AtGLP21	Ath|AtGLP30	0.8876
Ath|AtGLP21	Ath|AtGLP31	0.8586
Ath|AtGLP21	Ath|AtGLP32	0.8797
Ath|AtGLP21	Ath|AtGLP33	0.8586
Ath|AtGLP25	Ath|AtGLP18	0.9339
Ath|AtGLP25	Ath|AtGLP21	0.9732
Ath|AtGLP25	Ath|AtGLP22	0.9713
Ath|AtGLP25	Ath|AtGLP23	1.0067
Ath|AtGLP25	Ath|AtGLP27	0.8811
Ath|AtGLP25	Ath|AtGLP28	0.8515
Ath|AtGLP25	Ath|AtGLP30	0.856
Ath|AtGLP25	Ath|AtGLP31	0.8404
Ath|AtGLP25	Ath|AtGLP32	0.8483
Ath|AtGLP25	Ath|AtGLP33	0.8392
Ath|AtGLP9	Ath|AtGLP10	1.0274
Ath|AtGLP9	Ath|AtGLP11	1.0061
Ath|AtGLP9	Ath|AtGLP12	1.0287
Ath|AtGLP9	Ath|AtGLP13	0.8644
Ath|AtGLP9	Ath|AtGLP15	0.9101
Ath|AtGLP15	Ath|AtGLP10	0.9294
Ath|AtGLP15	Ath|AtGLP11	0.9405
Ath|AtGLP15	Ath|AtGLP12	0.932
Ath|AtGLP15	Ath|AtGLP13	1.0236
Ath|AtGLP15	Ath|AtGLP27	1.019
Ath|AtGLP15	Ath|AtGLP28	1.0196
Ath|AtGLP15	Ath|AtGLP29	1.0396
Ath|AtGLP15	Ath|AtGLP30	1.0196
Ath|AtGLP15	Ath|AtGLP31	1.0409
Ath|AtGLP15	Ath|AtGLP32	1.0183
Ath|AtGLP15	Ath|AtGLP33	1.0434
Ath|AtGLP15	Ath|AtGLP9	0.9101
Ath|AtGLP5	Ath|AtGLP4	1.19037
Ath|AtGLP5	Ath|AtGLP8	0.7529
Ath|AtGLP14	Ath|AtGLP20	0.8463
Ath|AtGLP31	Ath|AtGLP13	0.865
Ath|AtGLP31	Ath|AtGLP15	1.0409
Ath|AtGLP31	Ath|AtGLP18	0.9308
Ath|AtGLP31	Ath|AtGLP21	0.8586
Ath|AtGLP31	Ath|AtGLP23	0.8327
Ath|AtGLP31	Ath|AtGLP25	0.8404
Ath|AtGLP31	Ath|AtGLP27	1.13689
Ath|AtGLP31	Ath|AtGLP28	1.1047
Ath|AtGLP31	Ath|AtGLP29	1.4043
Ath|AtGLP31	Ath|AtGLP30	1.1066
Ath|AtGLP31	Ath|AtGLP32	1.0989
Ath|AtGLP31	Ath|AtGLP33	1.41966
Ath|AtGLP4	Ath|AtGLP5	1.19037
Ath|AtGLP4	Ath|AtGLP8	0.7149
Ath|AtGLP20	Ath|AtGLP14	0.8463
Ath|AtGLP10	Ath|AtGLP11	0.9913
Ath|AtGLP10	Ath|AtGLP12	1.0081
Ath|AtGLP10	Ath|AtGLP13	0.8224
Ath|AtGLP10	Ath|AtGLP15	0.9294
Ath|AtGLP10	Ath|AtGLP9	1.0274

## Sheet: Orthologs
Orthologs information
Araip|AiGLP29	Aradu|AdGLP36	0.98311		Ath|AtGLP19	Arahy|AhGLP12	1.1075		Aradu|AdGLP28	Araip|AiGLP18	2.13431		Arahy|AhGLP29	Araip|AiGLP15	0.78247
Araip|AiGLP29	Arahy|AhGLP80	0.86324		Ath|AtGLP3	Arahy|AhGLP58	0.9615		Aradu|AdGLP28	Arahy|AhGLP25	1.78611		Arahy|AhGLP29	Aradu|AdGLP22	0.9332
Araip|AiGLP1	Aradu|AdGLP1	1.04365		Ath|AtGLP17	Araip|AiGLP6	1.1325		Aradu|AdGLP6	Araip|AiGLP2	1.97423		Arahy|AhGLP84	Araip|AiGLP32	0.5994
Araip|AiGLP1	Arahy|AhGLP46	0.90365		Ath|AtGLP17	Aradu|AdGLP36	1.1713		Aradu|AdGLP6	Arahy|AhGLP7	1.81638		Arahy|AhGLP83	Araip|AiGLP31	1.79036
Araip|AiGLP20	Ath|AtGLP15	1.1171		Ath|AtGLP17	Arahy|AhGLP42	1.1572		Aradu|AdGLP36	Araip|AiGLP29	0.98311		Arahy|AhGLP64	Araip|AiGLP24	1.79987
Araip|AiGLP20	Aradu|AdGLP18	1.01413		Ath|AtGLP34	Araip|AiGLP32	0.5951		Aradu|AdGLP36	Ath|AtGLP17	1.1713		Arahy|AhGLP6	Aradu|AdGLP1	0.90037
Araip|AiGLP20	Arahy|AhGLP63	0.87567		Ath|AtGLP34	Aradu|AdGLP37	0.5513		Aradu|AdGLP36	Arahy|AhGLP42	0.8768		Arahy|AhGLP33	Aradu|AdGLP33	1.48661
Araip|AiGLP12	Arahy|AhGLP67	1.89217		Ath|AtGLP34	Arahy|AhGLP37	0.7625		Aradu|AdGLP16	Arahy|AhGLP27	0.74811		Arahy|AhGLP66	Araip|AiGLP19	1.90207
Araip|AiGLP32	Ath|AtGLP34	0.5951		Ath|AtGLP16	Arahy|AhGLP50	0.9811		Aradu|AdGLP2	Araip|AiGLP6	1.15849		Arahy|AhGLP68	Araip|AiGLP16	2.11728
Araip|AiGLP32	Aradu|AdGLP37	0.6696		Ath|AtGLP15	Araip|AiGLP22	1.1171		Aradu|AdGLP2	Arahy|AhGLP2	1.04297		Arahy|AhGLP57	Araip|AiGLP10	1.70045
Araip|AiGLP32	Arahy|AhGLP84	0.5994		Ath|AtGLP15	Araip|AiGLP20	1.1171		Aradu|AdGLP14	Araip|AiGLP10	1.90474		Arahy|AhGLP14	Araip|AiGLP4	1.46926
Araip|AiGLP25	Aradu|AdGLP33	1.73765		Ath|AtGLP15	Aradu|AdGLP27	1.1279		Aradu|AdGLP14	Arahy|AhGLP16	1.70022		Arahy|AhGLP50	Ath|AtGLP16	0.9811
Araip|AiGLP25	Arahy|AhGLP74	1.48325		Ath|AtGLP15	Arahy|AhGLP63	1.1261		Aradu|AdGLP21	Araip|AiGLP11	2.07534		Arahy|AhGLP25	Aradu|AdGLP28	1.78611
Araip|AiGLP22	Ath|AtGLP15	1.1171						Aradu|AdGLP21	Arahy|AhGLP31	1.85719		Arahy|AhGLP65	Araip|AiGLP18	1.75778
Araip|AiGLP22	Aradu|AdGLP18	1.01413						Aradu|AdGLP12	Araip|AiGLP9	1.02639		Arahy|AhGLP1	Araip|AiGLP27	1.96473
Araip|AiGLP22	Arahy|AhGLP63	0.87567						Aradu|AdGLP12	Arahy|AhGLP15	0.87814		Arahy|AhGLP67	Araip|AiGLP12	1.89217
Araip|AiGLP2	Aradu|AdGLP6	1.97423						Aradu|AdGLP37	Araip|AiGLP32	0.6696		Arahy|AhGLP67	Aradu|AdGLP19	1.87527
Araip|AiGLP2	Arahy|AhGLP47	1.72606						Aradu|AdGLP37	Ath|AtGLP34	0.5513		Arahy|AhGLP17	Aradu|AdGLP26	0.80536
Araip|AiGLP6	Ath|AtGLP17	1.1325						Aradu|AdGLP37	Arahy|AhGLP45	0.75486		Arahy|AhGLP43	Aradu|AdGLP35	1.94504
Araip|AiGLP6	Aradu|AdGLP2	1.15849						Aradu|AdGLP33	Araip|AiGLP25	1.73765		Arahy|AhGLP37	Ath|AtGLP34	0.7625
Araip|AiGLP6	Arahy|AhGLP55	1.10195						Aradu|AdGLP33	Arahy|AhGLP33	1.48661		Arahy|AhGLP2	Aradu|AdGLP2	1.04297
Araip|AiGLP16	Aradu|AdGLP29	2.16395						Aradu|AdGLP1	Araip|AiGLP1	1.04365		Arahy|AhGLP15	Aradu|AdGLP12	0.87814
Araip|AiGLP16	Arahy|AhGLP69	2.11728						Aradu|AdGLP1	Arahy|AhGLP6	0.90037		Arahy|AhGLP49	Araip|AiGLP3	0.90943
Araip|AiGLP16	Arahy|AhGLP68	2.11728						Aradu|AdGLP27	Araip|AiGLP15	1.0585		Arahy|AhGLP56	Araip|AiGLP9	0.87981
Araip|AiGLP15	Aradu|AdGLP27	1.0585						Aradu|AdGLP27	Ath|AtGLP15	1.1279		Arahy|AhGLP16	Aradu|AdGLP14	1.70022
Araip|AiGLP15	Arahy|AhGLP29	0.78247						Aradu|AdGLP18	Araip|AiGLP22	1.01413		Arahy|AhGLP82	Araip|AiGLP30	2.00556
Araip|AiGLP19	Aradu|AdGLP20	2.11025						Aradu|AdGLP18	Araip|AiGLP20	1.01413		Arahy|AhGLP3	Aradu|AdGLP3	0.74094
Araip|AiGLP19	Arahy|AhGLP66	1.90207						Aradu|AdGLP18	Arahy|AhGLP63	0.86465		Arahy|AhGLP9	Aradu|AdGLP8	1.92788
Araip|AiGLP26	Aradu|AdGLP31	1.90126						Aradu|AdGLP32	Araip|AiGLP27	2.31972		Arahy|AhGLP63	Araip|AiGLP22	0.87567
Araip|AiGLP26	Arahy|AhGLP73	0.78783						Aradu|AdGLP32	Arahy|AhGLP34	1.9968		Arahy|AhGLP63	Araip|AiGLP20	0.87567
Araip|AiGLP14	Aradu|AdGLP26	0.92833						Aradu|AdGLP25	Arahy|AhGLP18	0.87141		Arahy|AhGLP63	Ath|AtGLP15	1.1261
Araip|AiGLP14	Arahy|AhGLP60	0.85952						Aradu|AdGLP29	Araip|AiGLP16	2.16395		Arahy|AhGLP63	Aradu|AdGLP18	0.86465
Araip|AiGLP24	Arahy|AhGLP64	1.79987						Aradu|AdGLP30	Arahy|AhGLP30	1.94132		Arahy|AhGLP55	Araip|AiGLP6	1.10195
Araip|AiGLP17	Aradu|AdGLP19	2.48633						Aradu|AdGLP3	Araip|AiGLP28	0.86779		Arahy|AhGLP7	Aradu|AdGLP6	1.81638
Araip|AiGLP17	Arahy|AhGLP70	1.91115						Aradu|AdGLP3	Arahy|AhGLP3	0.74094		Arahy|AhGLP11	Aradu|AdGLP9	1.73934
Araip|AiGLP7	Aradu|AdGLP9	2.17726						Aradu|AdGLP17	Arahy|AhGLP19	1.94634		Arahy|AhGLP73	Araip|AiGLP26	0.78783
Araip|AiGLP7	Arahy|AhGLP51	1.72489						Aradu|AdGLP35	Araip|AiGLP30	2.02892		Arahy|AhGLP73	Aradu|AdGLP31	0.79939
Araip|AiGLP10	Aradu|AdGLP14	1.90474						Aradu|AdGLP35	Arahy|AhGLP43	1.94504		Arahy|AhGLP12	Ath|AtGLP19	1.1075
Araip|AiGLP10	Arahy|AhGLP57	1.70045						Aradu|AdGLP20	Araip|AiGLP19	2.11025		Arahy|AhGLP18	Aradu|AdGLP25	0.87141
Araip|AiGLP30	Aradu|AdGLP35	2.02892						Aradu|AdGLP20	Arahy|AhGLP24	1.82523		Arahy|AhGLP51	Araip|AiGLP7	1.72489
Araip|AiGLP30	Arahy|AhGLP82	2.00556						Aradu|AdGLP11	Araip|AiGLP4	1.73268		Arahy|AhGLP24	Aradu|AdGLP20	1.82523
Araip|AiGLP4	Aradu|AdGLP11	1.73268						Aradu|AdGLP11	Arahy|AhGLP54	1.48998		Arahy|AhGLP71	Araip|AiGLP28	0.72966
Araip|AiGLP4	Arahy|AhGLP14	1.46926						Aradu|AdGLP26	Araip|AiGLP14	0.92833		Arahy|AhGLP27	Aradu|AdGLP16	0.74811
Araip|AiGLP11	Aradu|AdGLP21	2.07534						Aradu|AdGLP26	Arahy|AhGLP17	0.80536		Arahy|AhGLP31	Aradu|AdGLP21	1.85719
Araip|AiGLP11	Arahy|AhGLP59	1.87069						Aradu|AdGLP19	Araip|AiGLP17	2.48633		Arahy|AhGLP46	Araip|AiGLP1	0.90365
Araip|AiGLP31	Arahy|AhGLP83	1.79036						Aradu|AdGLP19	Arahy|AhGLP67	1.87527		Arahy|AhGLP70	Araip|AiGLP17	1.91115
Araip|AiGLP9	Aradu|AdGLP12	1.02639						Aradu|AdGLP31	Araip|AiGLP26	1.90126		Arahy|AhGLP58	Ath|AtGLP3	0.9615
Araip|AiGLP9	Arahy|AhGLP56	0.87981						Aradu|AdGLP31	Arahy|AhGLP73	0.79939		Arahy|AhGLP80	Araip|AiGLP29	0.86324
Araip|AiGLP3	Arahy|AhGLP49	0.90943						Aradu|AdGLP9	Araip|AiGLP7	2.17726		Arahy|AhGLP74	Araip|AiGLP25	1.48325
Araip|AiGLP28	Aradu|AdGLP3	0.86779						Aradu|AdGLP9	Arahy|AhGLP11	1.73934		Arahy|AhGLP47	Araip|AiGLP2	1.72606
Araip|AiGLP28	Arahy|AhGLP71	0.72966						Aradu|AdGLP22	Arahy|AhGLP29	0.9332		Arahy|AhGLP45	Aradu|AdGLP37	0.75486
Araip|AiGLP18	Aradu|AdGLP28	2.13431						Aradu|AdGLP8	Arahy|AhGLP9	1.92788		Arahy|AhGLP42	Ath|AtGLP17	1.1572
Araip|AiGLP18	Arahy|AhGLP65	1.75778										Arahy|AhGLP42	Aradu|AdGLP36	0.8768
Araip|AiGLP27	Aradu|AdGLP32	2.31972										Arahy|AhGLP59	Araip|AiGLP11	1.87069
Araip|AiGLP27	Arahy|AhGLP1	1.96473										Arahy|AhGLP19	Aradu|AdGLP17	1.94634
												Arahy|AhGLP30	Aradu|AdGLP30	1.94132
												Arahy|AhGLP69	Araip|AiGLP16	2.11728
												Arahy|AhGLP60	Araip|AiGLP14	0.85952
												Arahy|AhGLP54	Aradu|AdGLP11	1.48998
												Arahy|AhGLP34	Aradu|AdGLP32	1.9968

## Sheet: Summary
Summary of the Identified orthologous gene clusters
Species	Proteins	Clusters	Singletons
Arahy	84	39	12
Aradu	37	26	5
Araip	32	23	4
Ath	34	8	5
The species form 42 clusters, 42 orthologous clusters (at least contains two species) and 0 single-copy gene clusters.
